# Supplementary material for: Diabetes mellitus early warning and factor analysis using ensemble Bayesian networks with SMOTE-ENN and Boruta
Source: PubMed Central journal article supplement (PMC10404250; doi:10.1038/s41598-023-40036-5), 2023-08-05
Supplement: 41598_2023_40036_MOESM1_ESM.pdf [file 41598_2023_40036_MOESM1_ESM.pdf]

# **Diabetes mellitus early warning and factor analysis using ensemble Bayesian networks with SMOTE-ENN and Boruta**

**Xuchun Wang<sup>a</sup>, Jiahui Ren<sup>a</sup>, Hao Ren<sup>a</sup>, Wenzhu Song<sup>a</sup>, Yuchao Qiao<sup>a</sup>, Ying Zhao<sup>b</sup>, Liqin Linghu<sup>a,b</sup>, Yu Cui<sup>a</sup>, Zhiyang Zhao<sup>a</sup>, Limin Chen<sup>c,\*</sup>, Lixia Qiu<sup>a,\*</sup>**

<sup>a</sup> Department of Health Statistics, School of Public Health, Shanxi Medical University, Taiyuan, Shanxi, China

<sup>b</sup> Shanxi Centre for Disease Control and Prevention, Taiyuan, Shanxi, 030012, China

<sup>c</sup> Shanxi Provincial People's Hospital, Taiyuan city, Shanxi Province, China

\* Correspondence author

E-mail: [sxchenlimin@163.com](mailto:sxchenlimin@163.com)(LMC); [qlx\\_1126@163.com](mailto:qlx_1126@163.com)(LXQ) ;

## Univariate analysis results

| Factors           | Level                          | N    | DM  | Rate (%) | $\chi^2$ | <i>P</i> |
|-------------------|--------------------------------|------|-----|----------|----------|----------|
| Age               | 18~45                          | 881  | 54  | 6.1      | 92.690   | <0.001   |
|                   | 45~60                          | 2027 | 274 | 13.5     |          |          |
|                   | ≥60                            | 1883 | 372 | 19.8     |          |          |
| Educational level | Elementary school and below    | 1989 | 332 | 16.7     | 13.544   | 0.001    |
|                   | Junior and senior high school  | 2467 | 332 | 13.5     |          |          |
|                   | College degree and above       | 4791 | 700 | 14.6     |          |          |
| Marital status    | Spinsterhood                   | 151  | 12  | 7.9      | 9.684    | 0.008    |
|                   | Married or cohabiting          | 4361 | 635 | 14.6     |          |          |
|                   | Divorced, widowed or separated | 279  | 53  | 19.0     |          |          |
| Region            | Rural                          | 3193 | 442 | 13.8     | 4.525    | 0.033    |
|                   | Urban                          | 1598 | 258 | 16.1     |          |          |
| Occupation        | Farmers                        | 2351 | 337 | 14.3     | 17.468   | 0.001    |
|                   | Non agricultural               | 2003 | 273 | 13.6     |          |          |
|                   | Unemployers                    | 147  | 24  | 16.3     |          |          |
|                   | Retirees                       | 290  | 66  | 22.8     |          |          |
| Gender            | Male                           | 2153 | 315 | 14.6     | 0.001    | 0.972    |
|                   | Female                         | 2638 | 385 | 14.6     |          |          |

Supplementary Table S1 Detection rate of DM with basic characteristics of different populations

| Factors              | Level        | N    | DM  | Rate (%) | $\chi^2$ | <i>P</i> |
|----------------------|--------------|------|-----|----------|----------|----------|
| Smoking              | everyday     | 1184 | 154 | 13.0     | 5.848    | 0.119    |
|                      | frequently   | 136  | 18  | 13.2     |          |          |
|                      | formerly     | 256  | 47  | 18.4     |          |          |
|                      | never        | 3215 | 481 | 15.0     |          |          |
| Drinking             | currently    | 849  | 130 | 15.3     | 10.498   | 0.005    |
|                      | formerly     | 362  | 32  | 8.8      |          |          |
|                      | never        | 3580 | 538 | 15.0     |          |          |
| Physical activity    | Insufficient | 3388 | 525 | 15.5     | 7.265    | 0.007    |
|                      | Sufficient   | 1403 | 175 | 12.5     |          |          |
| Sleep (h/d)          | <5           | 578  | 108 | 18.7     | 9.012    | 0.011    |
|                      | 5~7          | 751  | 101 | 13.4     |          |          |
|                      | ≥7           | 3462 | 491 | 14.2     |          |          |
| Agrypnia             | NO           | 2173 | 278 | 12.8     | 10.527   | 0.001    |
|                      | YES          | 2618 | 422 | 16.1     |          |          |
| Mediation time (h/d) | <3           | 1232 | 186 | 15.1     | 5.097    | 0.078    |
|                      | 3~5          | 1759 | 231 | 13.1     |          |          |
|                      | ≥5           | 1800 | 283 | 15.7     |          |          |
| Salt reduction       | NO           | 2643 | 405 | 13.3     | 11.760   | 0.001    |
|                      | YES          | 1743 | 295 | 16.9     |          |          |

Supplementary Table S2 Comparison of detection rates and differences of DM in different lifestyles

| Factors                     | Level     | N    | DM   | Rate (%) | $\chi^2$ | <i>P</i> |
|-----------------------------|-----------|------|------|----------|----------|----------|
| Family history              | NO        | 4137 | 508  | 12.3     | 143.302  | <0.001   |
|                             | YES       | 532  | 168  | 31.6     |          |          |
|                             | unclear   | 122  | 24   | 19.7     |          |          |
| Central obesity             | NO        | 1840 | 176  | 9.6      | 60.955   | <0.001   |
|                             | YES       | 2951 | 524  | 17.8     |          |          |
| Hypertension                | NO        | 2667 | 278  | 10.4     | 84.534   | <0.001   |
|                             | YES       | 2124 | 422  | 19.9     |          |          |
| Hyperlipidemia              | NO        | 1679 | 157  | 9.4      | 57.322   | <0.001   |
|                             | YES       | 3112 | 543  | 17.4     |          |          |
| BMI (kg/m <sup>2</sup> )    | <18.5     | 97   | 7    | 7.2      | 34.791   | 0.001    |
|                             | 18.5~24.0 | 1885 | 217  | 11.5     |          |          |
|                             | 24.0~28.0 | 1923 | 309  | 16.1     |          |          |
|                             | ≥28.0     | 886  | 167  | 18.8     |          |          |
| Heart rate(times/min)       | <60       | 52   | 5    | 9.6      | 7.202    | 0.027    |
|                             | 60~100    | 2403 | 380  | 15.8     |          |          |
|                             | ≥100      | 162  | 37   | 22.8     |          |          |
| Hemorrhagic apoplexy        | NO        | 4761 | 694  | 14.6     | 0.703    | 0.402    |
|                             | YES       | 30   | 6    | 20.0     |          |          |
| Cervical and lumbar disease | NO        | 3657 | 3135 | 14.3     | 1.404    | 0.236    |
|                             | YES       | 1134 | 178  | 15.7     |          |          |
| Chronic digestive diseases  | NO        | 4142 | 609  | 14.7     | 0.209    | 0.648    |
|                             | YES       | 649  | 91   | 14.0     |          |          |
| Anaphylactic disease        | NO        | 4503 | 655  | 14.5     | 0.304    | 0.581    |
|                             | YES       | 286  | 45   | 15.7     |          |          |

Supplementary Table S3 Comparison of detection rates and differences of DM in different physical condition
